# Supplementary material
Source: publisher figshare collection journal article supplement (https://tandf.figshare.com/articles/dataset/_/825937)
Supplement: Supplementary file 1 [file 3]

**Appendix I: Phytosociological tables**

**Species with 1 occurence:** *Anograma leptophylla*  5: +; *Linum bienne*  5: +; *Origanum virens*  5: +; *Rhagadiolus stellatus*  5: +; *Carlina racemosa*  6: +; *Jasione gracilis*  6: +; *Polycarpon tetraphyllum*  6: +; *Silene gallica*  6: +; *Bituminaria bituminosa* 9: +; *Ornithopus compressus* 9: +; *Plantago coronopus* 9: +; *Trifolium angustifolium* 9: +; *Carex laevigata*  10: 1; *Clematis campaniflora*  10: +; *Holcus mollis* 10: +; *Myosotis debilis*  10: 1; *Pteridium aquilinum*  10: 1; *Silene nutans* 11: +; *Petrorhagia nanteulii* 12: +; *Elaeoselinum gummiferum* 13: +; *Aegilops geniculata* 14: +; *Tuberaria guttata* 14: 1; *Geranium dissectum*  15: +; *Galium aparine* 18: +; *Silene latifolia*  18: 1; *Hypericum perfoliatum*  19: +; *Sanguisorba verrucosa* 19: +; *Allium ampeloprasum*  21: +; *Carex divisa*  21: +; *Molineriella laevis*  21: +; *Muscari commosum*  21: +; *Teesdalia nudicaulis*  21: +; *Lotus pedunculatus*  22: +; *Andryala laxiflora*  23: 1; *Carthamus lanatus*  23: 1; *Cyperus badius*  23: +; *Hedypnois cretica*  23: 1; *Hordeum leporinum*  23: +; *Piptatherum miliaceum*  23: +; *Torilis recta* 24: 1; *Trifolium campestre* 24: 1.

**Localities:** 1-3: Ervidel (Beja); 4, 7: Ocreza river (Bugios, Vila Velha de Ródão); 5, 10 e 22: Ocreza river (Poço da Sombra, Castelo Branco); 9, 12, 13, 14: Ocreza river (Taberna Seca, Castelo Branco); 6, 15, 20: Stream near Sobraínho da Ribeira (Casetlo Branco); 8, 11: Ocreza river (Padrão, Castelo Branco); 16: Ocreza river (Camões, Castelo Branco); 17: Tripeiro river (Serrasqueira, Castelo Branco); 18, 19: Ocreza river (Pereiros, Castelo Branco); 23: Moura (Barrancos); 24: Monte do Trigo (Évora) .

**Appendix II: Floristic appendix**

An alphabetical list of abbreviated *taxa* present in the article and in the phytosociological tables is shown below.

| *Arrhenatherum album: Arrhenatherum album* subsp. *album* |
| --- |
| *Arrhenatherum baeticum: Arrhenatherum elatius* subsp. *baeticum* |
| *Arrhenatherum bulbosum: Arrhenatherum elatius* subsp. *bulbosum*  *Arrhenatherum elatius: Arrhenatherum elatius* subsp. *elatius* |
| *Avena barbata: Avena barbata* subsp. *barbata* |
| *Crepis capillaris*: *Crepis capillaris* var. *capillaris* |
| *Cyperus badius*: *Cyperus longus* subsp. *badius* |
| *Dactylis lusitanica: Dactylis glomerata* subsp. *lusitanica* |
| *Dactylis hispanica: Dactylis glomerata* subsp. *hispanica* |
| *Daucus maximus: Daucus carota* subsp. *maximus* |
| *Digitalis x coutinhoi: Digitalis. purpurea* subsp. *purpurea x Digitalis thapsi* |
| *Eleocharis palustris: Eleocharis palustris* subsp. *palustris* |
| *Festuca arundinacea*: *Festuca arundinacea* subsp. *arundinacea* |
| *Galium erectum: Galium mollugo* subsp. *erectum* |
| *Galium palustre: Galium palustre* subsp. *palustre* |
| *Galium parisiense: Galium parisiense* subsp. *parisiense* var. *parisiense* |
| *Holcus annuus: Holcus annuus* subsp. *annuus* |
| *Hordeum leporinum: Hordeum murinum* subsp. *leporinum* |
| *Hyparrhenia pubescens*: *Hyparrhenia hirta* subsp. *pubescens* |
| *Jasione gracilis: Jasione montana* var. *gracilis* |
| *Juncus subglomeratus: Juncus effusus* var. *subglomeratus* |
| *Leontodon longirostris: Leontodon taraxacoides* subsp. *longirostris* |
| *Melica magnolii: Melica ciliata* subsp*. magnolii* |
| *Montia amporitana: Montia fontana* subsp. *amporitana* |
| *Myosotis dubia: Myosotis discolor* subsp. *dubia* |
| *Poa sylvicola: Poa trivialis* subsp. *sylvicola* |
| *Poa trivialis: Poa trivialis* subsp. *trivialis* |
| *Polypogon maritimus: Polypogon maritimus* subsp. *maritimus* |
| *Ranunculus adscendens: Ranunculus bulbosus* subsp. *aleae* var. *adscendens* |
| *Ranunculus baudotii: Ranunculus peltatus* subsp. *baudotii* |
| *Romulea bulbocodium: Romulea bulbocodium* subsp. *bulbocodium* |
| *Rumex acetosa: Rumex acetosa* subsp. *acetosa* |
| *Rumex woodsii: Rumex pulcher* subsp. *woodsii* |
| *Sisymbrella aspera: Sisymbrella aspera* subsp. *aspera* |
| *Torilis purpurea: Torilis arvensis* subsp. *purpurea* |
| *Torilis recta: Torilis arvensis* subsp. *recta* |
| *Trifolium repens: Trifolium repens* subsp. *repens* var. *repens* |
| *Holcus mollis: Holcus mollis* subsp*. mollis* |
| *Jasione montana: Jasione montana* var. *gracilis* |
| *Galium aparine: Galium aparine* subsp*. aparine* |
| *Silene nutans: Silene nutans* subsp. *nutans* |
| *Vicia nigra: Vicia sativa* subsp*. nigra* |
